1                   **How early into the outbreak can surveillance of SARS-CoV-2 in wastewater tell us?**

2           **Pei-Ying Hong <sup>1\*</sup>, Andri Taruna Rachmadi <sup>1</sup>, David Mantilla-Calderon <sup>1</sup>, Mohsen Alkahtani <sup>2</sup>, Yasir**  
3                                   **M. Bashwari <sup>3</sup>, Hamed Al Qarni <sup>3</sup>, Jianqiang Zhou <sup>1</sup>**

4   <sup>1</sup>. Division of Biological and Environmental Science and Engineering, Water Desalination and Reuse  
5   Center, King Abdullah University of Science and Technology (KAUST), Thuwal 23955-6900, Saudi Arabia

6   <sup>2</sup>. Environmental Health Laboratory, Jeddah, Ministry of Health, Saudi Arabia

7   <sup>3</sup>. General Directorate of Environment Health, Ministry of Health, Saudi Arabia

8  
9  
10  
11  
12  
13  
14

15   \* Corresponding author

16   Email: [peiyong.hong@kaust.edu.sa](mailto:peiyong.hong@kaust.edu.sa)

17   Phone: +966 12 8082218

18

19 **Abstract**

20 There is increasing interest to use wastewater-based surveillance of SARS-CoV-2 as an early warning of  
21 the outbreak within a community. Despite successful detection of SARS-CoV-2 in wastewaters sampled  
22 from multiple locations, there is still no clear idea on the minimal number of cases needed in a community  
23 to result in a positive detection of the virus in wastewaters. To address this knowledge gap, we sampled  
24 wastewaters from a septic tank and biological activated sludge tank located on-site of a hospital. The  
25 hospital is providing treatment for SARS-CoV-2 infected patients, with the number of hospitalized patients  
26 per day known. It was observed that > 253 positive cases out of 10,000 persons are required prior to  
27 detecting SARS-CoV-2 in wastewater. There was a weak correlation between N1 and N2 gene  
28 abundances in wastewater with the number of hospitalized cases. This correlation was however not  
29 observed for N3 gene. The occurrence frequency of SARS-CoV-2 is at least 5 times lower in the partially  
30 treated wastewater than in the septic tank. Furthermore, abundance of N1 and N3 genes in the activated  
31 sludge tank were 50 and 70% of the levels detected in septic tank, suggesting poor persistence of the  
32 SARS-CoV-2 gene fragments in wastewater.

33

34

35

36

37

38

39

40

41 **Keywords:**

42 Wastewater-based epidemiology, Covid-19, reverse transcription quantitative PCR, detection sensitivity,

43 log reduction

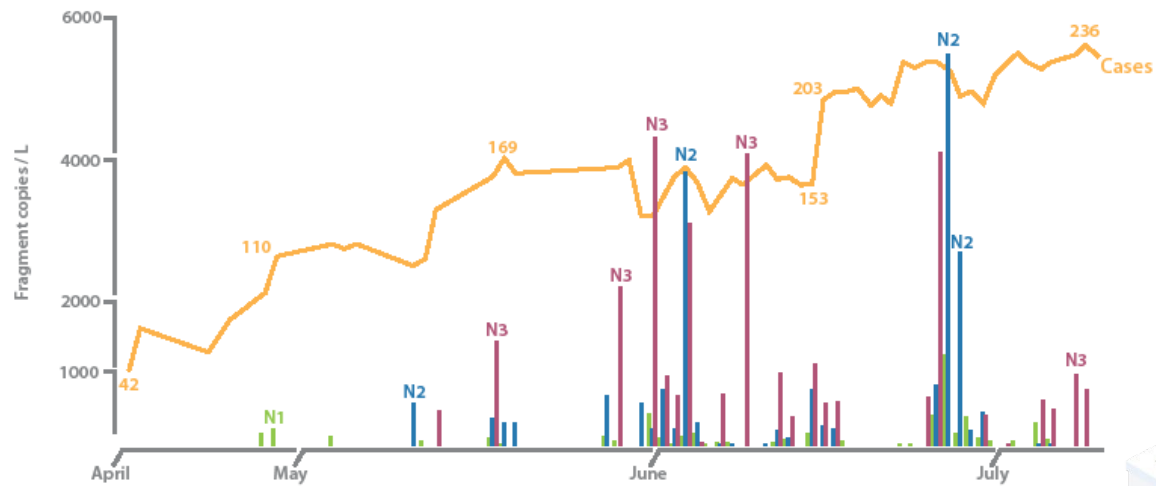

- 15.4% samples positive
- Average N1: 81.1 copy/L
- Average N2: 1115.8 copy/L
- Average N3: 411.2 copy/L

Biological tank

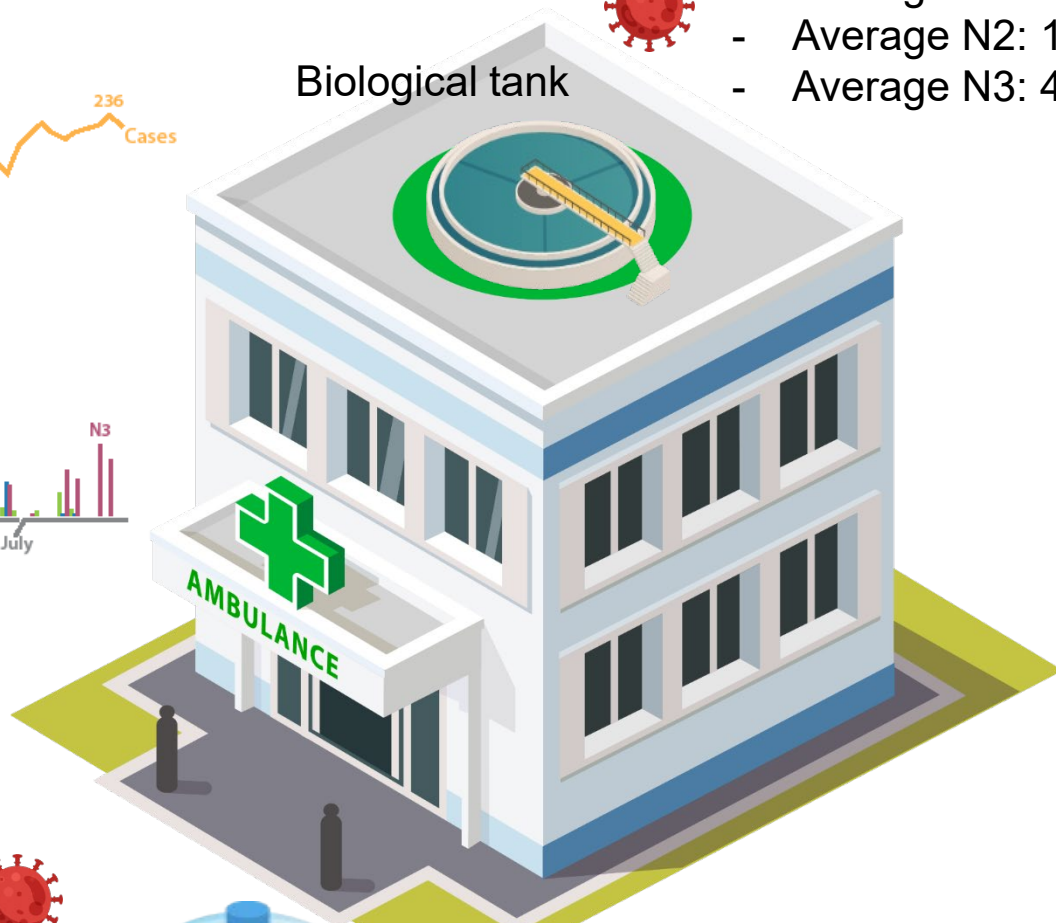

- 75.4% samples positive
- Average N1: 173.7 copy/L
- Average N2: 772.1 copy/L
- Average N3: 1327.4 copy/L

Underground tank

## 44 **Introduction**

45 Data from the World Health Organization suggests that approximately 80% of Covid-19 infected  
46 individuals exhibit only mild symptoms or are asymptomatic <sup>1</sup>. In particular, asymptomatic cases are  
47 concerning as these individuals cannot be detected easily by the current swab testing protocols and can  
48 unknowingly transmit the virus to others. Although lockdown and curfew are very effective in slowing the  
49 spread of SARS-CoV-2, such intervention measures in the long term is unsustainable, and remains as a  
50 key but not the only solution to mitigating Covid-19. The other solution lies in increasing our testing  
51 capacity. However, to swab everyone in a country for clinical surveillance over a long term period is  
52 impractical considering the amount of resources and labor hours needed. In contrast, monitoring for  
53 SARS-CoV-2 directly in wastewaters over a longer duration would be an alternate method to complement  
54 clinical surveillance since about 39 to 65% of infected hosts, including asymptomatic carriers, shed the  
55 virus through their feces, while about 6% of patients shed it through urine <sup>2, 3</sup>.

56 By sampling for the waste stream generated from a community, we therefore have a composite  
57 sample that would be suitable for wastewater-based epidemiology (WBE). WBE is an approach that  
58 includes the qualitative and quantitative determination of biomarkers in raw wastewater to provide  
59 information on inhabitants within that wastewater catchment area. Monitoring for SARS-CoV-2 in  
60 wastewater has been demonstrated in many countries, including the Netherlands, Australia, Italy, Spain  
61 and US <sup>4-9</sup>. In these studies, SARS-CoV-2 was sporadically detected from the sampled wastewaters, and  
62 the reported abundance of SARS-CoV-2 in wastewater ranged from 19 to  $2.2 \times 10^8$  copies/L. In some  
63 instances, the WBE approach was able to detect SARS-CoV-2 in wastewater before clinically diagnosed  
64 cases were made known <sup>10</sup>. WBE hence demonstrates potential to serve as an early warning of  
65 re(emergence) of Covid-19 in communities <sup>7</sup>. However, without knowing the minimal number of positive  
66 cases needed in each community to achieve consistent detection of SARS-CoV-2 from the sewage  
67 networks, the definition of how early into the outbreak WBE can inform us remains rather unclear.

68 Ideally, the detection sensitivity of WBE can be defined by knowing the total number of  
69 symptomatic and asymptomatic individuals present in the community served by the wastewater treatment  
70 system. The volume of untreated sewage entering to the wastewater treatment plant (WWTP) should also  
71 be defined to estimate the total number of inhabitants served by the WWTP. While the latter requirement

72 can be easily determined, the number of infected individuals is difficult to obtain unless an active  
73 surveillance is conducted to swab test all individuals, including asymptomatic ones, in the community. To  
74 circumvent this limitation, a controlled community, for example, hospitals providing treatment to Covid-19  
75 patients can be used as a model. In this manner, the number of patients contributing SARS-CoV-2 to the  
76 hospital wastewaters are known through daily hospitalization and discharge records. Besides determining  
77 the detection sensitivity of WBE using hospital wastewaters as a study model, we further evaluate the  
78 correlation between detected abundance of SARS-CoV-2 gene fragments in wastewater with the number  
79 of patients. The abundance of nucleocapsid gene fragments as it moves from the underground septic  
80 tank to the first stage of the wastewater treatment plant situated on-site was also evaluated.

81 Findings from this study will provide inference to the minimal number of SARS-CoV-2 infected cases  
82 needed to generate quantitative PCR (qPCR) signals associated with the virus shed into a highly diluted  
83 wastewater stream. The correlation analysis provide insights to which of the nucleocapsid gene  
84 abundance would vary according to the number of infected individuals. Lastly, the persistence of the  
85 nucleocapsid genes in wastewater can be inferred by determining the changes in their abundance along  
86 different stages of the wastewater treatment plant.

87

## 88 **Materials and methods**

89

### 90 *Quality control of sample processing and RNA extraction protocols*

91 To determine recovery and viral nucleic acid extraction efficiency, a known concentration of murine  
92 norovirus (MNV) was spiked into untreated wastewater. MNV was spiked as surrogate because it is a  
93 positive-sense single-stranded RNA virus like SARS-CoV-2, and will likely be similar in terms of RNA  
94 extraction efficiency. Quantitative PCR (qPCR) for MNV was performed using forward primer (5'-  
95 CCGCAGGAACGCTCAGCAG-3'), reverse primer (5'- GGYTGAATGGGGACGGCCTG-3') and Taqman  
96 probe (5'- FAM-ATGAGTGATGGCGCA-ZEN/IBFQ-3') (Integrated DNA Technologies, Leuven, Belgium  
97 <sup>11</sup>. A six-points standard curve was generated using a synthetic oligonucleotide (gblocks® gene fragment,  
98 Integrated DNA technologies, IA, USA) containing 300-350 bp DNA sequence that encompasses a

99 complementary region for which the primers and probes would anneal to. An amplification efficiency of  
100 102.7% was achieved. LOD for MNV qPCR reaction was 3.89-log copies/L and 10 copy/well,  
101 respectively. MNV is not anticipated to be present in municipal wastewaters and hence abundances  
102 detected by means of qPCR would be due to the spiking event.

103

#### 104 *Sampling of hospital wastewaters from Jeddah, Saudi Arabia*

105 Wastewater discharged from the hospital was collected at two sampling points of the wastewater  
106 treatment plant (WWTP) located on-site. The first sampling point was the underground septic tank and  
107 the second sampling point was from the aerobic biological tank located on the roof of the hospital. The  
108 daily wastewater intake for the on-site WWTP is 750 m<sup>3</sup>. The volume of wastewater generated by this  
109 hospital approximates the size of a community with ca. 2884 persons based on an average capita water  
110 usage of 260 L/person/d <sup>12</sup>. The hospital wastewater is treated first by biological activated sludge system,  
111 operated with hydraulic retention time of 9 h. The secondary-treated wastewater is then disinfected with  
112 100 mg/L chlorine at a contact time of 2 h. Approximately 1 L of grab sample was individually collected  
113 from the underground tank (i.e., representing untreated wastewater) and from the top aqueous layer of  
114 the biological activated sludge tank (i.e., partially treated wastewater). The entire sampling duration was  
115 from 15 April to 9 July 2020, with frequencies ranging from 3 to 5 daily samples per week (Table S1). The  
116 lower sampling frequency during the early stages of the outbreak was due to the movement restriction  
117 order imposed in the city. Samples were stored at 4°C for not more than 1 week before they were  
118 processed.

119

#### 120 *Processing of wastewater samples*

121 250 to 500 mL of samples were individually concentrated for viral particles using the Millipore HA  
122 membrane method with slight modifications <sup>13</sup>. Briefly, 2 mL of 2.5 M MgCl<sub>2</sub> was added to every 100 mL  
123 of the sample, agitated for 3 minutes and left to stand for 3 minutes. The samples were then filtered  
124 through the HA membrane. The HA membrane was then filtered through with 200 mL of 0.5 mM H<sub>2</sub>SO<sub>4</sub> to

125 adjust the isoelectric point of viruses. The viral particles retained on the HA membrane were eluted with  
126 10 mL of 1 mM NaOH into a sterile collection tube that contained 100  $\mu$ L of 100X tris-EDTA buffer and 50  
127  $\mu$ L of 100 mM H<sub>2</sub>SO<sub>4</sub>. The eluate was concentrated with Centriprep YM-50 (Millipore) to approximately  
128 680  $\mu$ L, and an aliquot of 140  $\mu$ L was extracted for its RNA using QIAmp Viral RNA kit (ThermoFisher  
129 Scientific, Carlsbad, CA). QIAmp Viral RNA kit is suggested by the US CDC as one of the extraction  
130 protocols to generate highly purified RNA <sup>14</sup>. Extracted RNA was converted to complementary DNA  
131 (cDNA) using Superscript III First Strand Synthesis System (ThermoFisher Scientific).

132

### 133 *Quantitative PCR*

134 Genes associated with nucleocapsid (N) proteins N1, N2 and N3 of SARS-CoV-2 were targeted for  
135 quantitative PCR <sup>15</sup>. G-blocks that include the annealing regions of N1, N2 and N3 primers-probes were  
136 synthesized based on the published sequences of SARS-CoV-2 <sup>16</sup>. Six-point standard curves were  
137 generated for each of the primer-probe pair to determine their respective amplification efficiencies. Limit  
138 of detection is estimated based on the lowest copy number of G-block template with detectable threshold  
139 Cq value. Based on the standard curves, the average amplification efficiency were 92.5%, 91.5%, 90.8%  
140 and the R<sup>2</sup> value ranged from 0.98-0.99, 0.97-0.99, and 0.97-0.99 for N1, N2, and N3, respectively. The  
141 LOD was 5 copy/well, corresponding to 3.85-, 4.25-, and 3.35-log copies/L for N1, N2, and N3 qPCR  
142 reaction, respectively. A non-template control serves as negative control. A positive control made up from  
143 cDNA derived from RNA of SARS-CoV-2-positive clinical swab specimens was also included for qPCR.  
144 Positive controls have average Cq value of 29 for N1, 30 to 31 for N2 and N3 genes. Thermal cycling  
145 conditions include 50 cycles of 95°C for denaturation (3 s) and 55°C for annealing and amplification (30  
146 s). All samples, standards and controls were performed in technical duplicates.

147

## 148 **Results and discussion**

149

### 150 *Recovery and extraction efficiency*

151 A total of 6.89-log copies/L MNV was spiked into the untreated wastewater. The overall recovery and  
152 RNA extraction efficiency of murine norovirus was ca. 45%, and falls within the range reported by earlier  
153 studies (ranging from 10% to 73%) albeit using different concentration procedures. For example, direct  
154 ultracentrifugation of 20 mL of wastewater through a 50% sucrose phase layer recovered 12% of the  
155 deactivated SARS-CoV-2 spiked into the sample <sup>17</sup>. Aluminium hydroxide adsorption-precipitation  
156 (adjusted to pH 6) method recovered on average 11% of spiked porcine epidemic diarrhea virus and  
157 mengovirus, respectively, from 200 mL wastewater <sup>8</sup>. Ultrafiltration of 100-200 mL using Centricon Plus-  
158 70 (molecular weight cut-off of 10 kDa) recovered an average 73% of the spiked F-specific RNA phages  
159 but with high standard deviation of 50% <sup>7</sup>.

160 In addition, the reported differences in recovery efficiencies can be due to the varying type of viral  
161 surrogates spiked. Different viruses have different isoelectric points (pI), which are the pH values at which  
162 the net surface charge switches. The determination of pI is particularly relevant for concentration  
163 protocols that utilize electrocharged membranes or coagulant adsorption-precipitation. Norovirus was  
164 previously reported to have a pI ranging from 5.5 to 6 <sup>18</sup>, while the spike protein of porcine epidemic  
165 diarrhea virus has a pI of 5.0 <sup>19</sup>. In contrast, there is no experimental data currently available that reports  
166 on the pI of SARS-CoV-2 but predictive calculations for some of its key proteins put the range of pI  
167 between 4.2 to 10.1 <sup>20</sup>. It is therefore uncertain which particular surrogate used thus far among studies  
168 would best approximate to SARS-CoV-2.

169 Regardless of the viral surrogates, recovery of viral particles from untreated wastewater has been  
170 challenging as evidenced from the wide range of reported efficiencies. High turbidity and organic carbon  
171 content in raw wastewater matrix can foul ultrafiltration membranes and decrease flux. In this study, the  
172 raw wastewater samples had an average dissolved organic carbon (DOC) concentration of 6.4 mg/L and  
173 average turbidity of 10.6 NTU (Table 1). DOC can facilitate unintended adsorption of virus onto the  
174 filtering glassware <sup>21</sup>, and hence lower the probability of recovering viral particles that are already present  
175 in low abundance and/or not homogeneously distributed in the wastewater matrix. Furthermore,  
176 suspended particles that accounted for turbidity can clog the membranes rapidly and permit only a limited



177 volume of untreated wastewater (< 500 mL) to be filtered through without significantly lengthening the  
178 processing time.

179

#### 180 *Detected abundance of SARS-CoV-2 in untreated hospital wastewaters*

181 43 out of the 57 collected samples of untreated hospital wastewaters (i.e., 75.4%) tested positive for the  
182 nucleocapsid genes of SARS-CoV-2. Compared to earlier studies which reported occurrence frequency  
183 to range from 15.6 to 50% of the collected municipal wastewaters <sup>4, 6, 9, 22, 23</sup>, the number of samples that  
184 were positive for SARS-CoV-2 occurred at higher frequency in this study. This is not surprising since the  
185 wastewaters originated from a hospital that provides treatment for Covid-19 infected patients. However,  
186 despite the confirmed presence of infected patients in this hospital since our first sampling date, we did  
187 not detect SARS-CoV-2 in the untreated wastewaters sampled on 15, 16, 22 and 24 April 2020. Instead,  
188 a relatively consistent detection of the SARS-CoV-2 N1 gene was only observed after 27 April 2020. Wu  
189 et al. determined correlation between wastewater viral titers and daily reports of new clinically confirmed  
190 Covid-19 cases in Boston, US, and found that the best correlation was seen when comparing new clinical  
191 cases back-dated by 4 days <sup>24</sup>. Hence, it is likely that a consistent detection of SARS-CoV-2 in the  
192 hospital wastewaters can be achieved when the cumulative number of Covid-19 patients in the hospital  
193 was > 73 (Figure 1). Considering that the daily wastewater intake for the on-site hospital WWTP is 750  
194 m<sup>3</sup>, the volume of wastewater generated by this hospital approximates the size of a community with ca.  
195 2884 persons based on an average capita water usage of 260 L/person/d <sup>12</sup>. This therefore suggests that  
196 the procedure described in this study has a detection sensitivity of ca. > 253 infected persons per 10,000  
197 inhabitants.

198 Similar to that reported by Medema et al. (2020), N1 and N2 genes were observed in the hospital  
199 wastewater first before N3 gene. The simultaneous detection of N1, N2 and N3 gene was observed after  
200 a cumulative 138 patients or more were hospitalized (i.e., > 464 infected persons per 10,000 inhabitants).  
201 With the exception of N1 and N2 gene exhibiting a weak correlation ( $r = 0.21$  and  $0.24$ , respectively),  
202 there was no apparent correlation between abundance of N3 genes and the number of hospitalized  
203 patients. The weak correlation and sporadic detection of SARS-CoV-2 genes in hospital wastewaters may

204 be dependent on the viral shedding load per patient and the shedding duration. In this study, information  
205 on whether patients are exhibiting gastrointestinal distress was not provided to us due to concerns of  
206 breaching patients' confidentiality. Hence it is uncertain how many percentage of the patients may be  
207 shedding the virus into the wastewater to result in the sporadic detection of SARS-CoV-2.

208

#### 209 *Log reduction of SARS-CoV-2 gene fragments at different stage of treatment process*

210 The biological activated sludge tank is an open-air tank placed on the roof of the hospital, and wastewater  
211 inside the tank was subjected to an increasing ambient temperature and solar irradiance during the  
212 sampling period as KSA enters into summer. To exemplify, maximum diurnal temperature increased from  
213 41.5 °C in April to 45.3 °C in May and 46.3 °C in June 2020, while minimum diurnal temperature also  
214 increased from 14.2 °C in April to 21 °C in June (personal communication, Matthew McCabe). The  
215 maximum net solar irradiation measured at 1 pm also increased from 1184.9 W/m<sup>2</sup> in April to 1333.0  
216 W/m<sup>2</sup> in June (personal communication, Matthew McCabe). Parameters related to water quality, namely  
217 DOC and turbidity were lower in values for wastewater sampled from the biological activated sludge tank  
218 compared to the underground septic tank (Table 1). This indicates a certain degree of partial treatment  
219 was achieved at the sampling point of the activated sludge tank.

220 Likewise, this level of partial treatment resulted in a lower detection frequency of SARS-CoV-2 in  
221 wastewaters sampled from the biological activated sludge tank. Only 8 out of 52 samples (15.4%)  
222 collected from the biological activated sludge tank were tested positive for N genes associated with  
223 SARS-CoV-2. Specifically, N1 genes were detected in 5 samples, N2 genes were detected in 4 samples,  
224 and 1 positive occurrence of N3 genes among the collected samples. N1 genes were detected first before  
225 N2 and N3. The average abundance of N1 and N3 genes decreased by 0.3-log (i.e., 50%) and 0.5-log  
226 (i.e., 70%), respectively, from the underground septic tanks to the biological activated sludge tank.  
227 However, there was an increase by 44% in the average abundance of N2 genes sampled from the  
228 activated sludge tank compared to that in the underground septic tank. This suggest a potential  
229 accumulation of N2 genes in the activated sludge tank, likely due to better persistence of N2 compared to  
230 N1 and N3 genes. Most of the positive detection in the biological activated sludge tank occurred in late

231 June, and coincides after a period of high cumulative numbers of hospitalized patients. Despite the slight  
232 increase of N2 genes in a small group of samples, it is unlikely that the N genes will persist in the final  
233 treated wastewater since the last stage of the hospital WWTP includes a final disinfection step at a very  
234 high chlorine concentration (100 mg/L) and at long contact time (2 h). An earlier study determined that 6.5  
235 mg/L of free chlorine and 1.5 h of contact time was already sufficient to remove 0.5 to  $18.7 \times 10^3$  copies/L  
236 of SARS-CoV-2 viral RNA to levels below detection limits <sup>25</sup>.

237

## 238 **Conclusion**

239 By utilizing a confined environment (i.e., a hospital with known number of Covid-19 cases), this study  
240 determined the detection sensitivity of wastewater-based epidemiology for SARS-CoV-2 to be about >  
241 253 persons per 10,000 inhabitants. The correlation between nucleocapsid gene abundances of SARS-  
242 CoV-2 and the number of infected hospitalized patients was weak, suggesting the difficulty in correlating  
243 the number of cases based on the gene abundances detected in wastewaters. However, it is likely that  
244 when the nucleocapsid genes were detected, there is already a substantial number of cases circulating in  
245 the community that would warrant immediate intervention measures to be taken. N genes do not persist  
246 well in the hospital wastewater based on the lower detection frequency in partially treated wastewater. In  
247 instances where the nucleocapsid genes were detected in the partially treated wastewater, N1 and N3  
248 genes had already decreased by 0.3-log and 0.5-log (i.e., ca. 50 and 70%, respectively). This is with the  
249 exception of N2 genes that may persist better than N1 and N3. Future studies would be needed to  
250 improve the recovery efficiency of viral particles from wastewater matrix, and to determine the decay  
251 kinetics of the N genes in various environmental conditions to facilitate the detection sensitivity and  
252 capabilities of WBE.

253

## 254 **Acknowledgements**

255 This work was funded by KAUST baseline grant BAS/1/1033-01-01 awarded to PYH. The authors would  
256 like to thank the medical team of the studied hospital for providing access to wastewater samples and for

257 saving lives during this pandemic. The authors would also like to thank Professor Matthew McCabe and  
258 Mr Samir Almashharawi for providing the ambient temperature and solar irradiance measured at the  
259 Hada Al Sham monitoring station.

260

261

262 **Supporting materials available**

263 Table: Information on the samples collected for this study.

264 **Table 1.** Summary of the percentage of samples detected positive for nucleocapsid genes of SARS-CoV-  
 265 2 and the average abundance among positive detection. Average dissolved organic carbon and turbidity  
 266  $\pm$  standard error were also measured for wastewaters collected at both sampling points.

267

|                                         | <b>% occurrence</b> | <b>Average copy numbers/L</b>        | <b>Average DOC (mg/L) <math>\pm</math> std error</b> | <b>Average NTU <math>\pm</math> std error</b> |
|-----------------------------------------|---------------------|--------------------------------------|------------------------------------------------------|-----------------------------------------------|
| <b>Underground septic tank</b>          | 75.4                | N1: 173.7<br>N2: 772.1<br>N3: 1327.4 | 6.40 $\pm$ 0.28                                      | 10.57 $\pm$ 0.99                              |
| <b>Biological activated sludge tank</b> | 15.4                | N1: 81.1<br>N2: 1115.8<br>N3: 411.2  | 4.51 $\pm$ 0.27                                      | 6.72 $\pm$ 0.93                               |
|                                         |                     |                                      |                                                      |                                               |

268

269 **Figure legend**

270 **Figure 1.** Abundance of nucleocapsid genes associated with SARS-CoV-2 and the number of  
271 hospitalized patients throughout the sampling period. (a) N1 gene, (b) N2 gene, (c) N3 gene. The dashed  
272 line in panel (a) indicates the number of hospitalized patients needed to obtain qPCR signals from this  
273 wastewater matrix.

- 275 1. WHO Q&A: Similarities and differences – COVID-19 and influenza. [https://www.who.int/news-](https://www.who.int/news-room/q-a-detail/q-a-similarities-and-differences-covid-19-and-influenza)  
 276 [room/q-a-detail/q-a-similarities-and-differences-covid-19-and-influenza](https://www.who.int/news-room/q-a-detail/q-a-similarities-and-differences-covid-19-and-influenza)
- 277 2. Chan, V. W.-S.; Chiu, P. K.-F.; Yee, C.-H.; Yuan, Y.; Ng, C.-F.; Teoh, J. Y.-C., A systematic review on  
 278 COVID-19: urological manifestations, viral RNA detection and special considerations in urological  
 279 conditions. *World J Urol* **2020**, 1-12.
- 280 3. Cheung, K. S.; Hung, I. F. N.; Chan, P. P. Y.; Lung, K. C.; Tso, E.; Liu, R.; Ng, Y. Y.; Chu, M. Y.; Chung,  
 281 T. W. H.; Tam, A. R.; Yip, C. C. Y.; Leung, K.-H.; Fung, A. Y.-F.; Zhang, R. R.; Lin, Y.; Cheng, H. M.; Zhang, A.  
 282 J. X.; To, K. K. W.; Chan, K.-H.; Yuen, K.-Y.; Leung, W. K., Gastrointestinal Manifestations of SARS-CoV-2  
 283 Infection and Virus Load in Fecal Samples From a Hong Kong Cohort: Systematic Review and Meta-  
 284 analysis. *Gastroenterology* **2020**.
- 285 4. Ahmed, W.; Angel, N.; Edson, J.; Bibby, K.; Bivins, A.; O'Brien, J. W.; Choi, P. M.; Kitajima, M.;  
 286 Simpson, S. L.; Li, J.; Tscharke, B.; Verhagen, R.; Smith, W. J. M.; Zaugg, J.; Dierens, L.; Hugenholtz, P.;  
 287 Thomas, K. V.; Mueller, J. F., First confirmed detection of SARS-CoV-2 in untreated wastewater in  
 288 Australia: A proof of concept for the wastewater surveillance of COVID-19 in the community. *Science of*  
 289 *The Total Environment* **2020**, 728, 138764.
- 290 5. Haramoto, E.; Malla, B.; Thakali, O.; Kitajima, M., First environmental surveillance for the  
 291 presence of SARS-CoV-2 RNA in wastewater and river water in Japan. *Science of The Total Environment*  
 292 **2020**, 737, 140405.
- 293 6. La Rosa, G.; Iaconelli, M.; Mancini, P.; Bonanno Ferraro, G.; Veneri, C.; Bonadonna, L.; Lucentini,  
 294 L.; Suffredini, E., First detection of SARS-CoV-2 in untreated wastewaters in Italy. *Science of The Total*  
 295 *Environment* **2020**, 736, 139652.
- 296 7. Medema, G.; Heijnen, L.; Elsinga, G.; Italiaander, R.; Brouwer, A., Presence of SARS-Coronavirus-  
 297 2 RNA in Sewage and Correlation with Reported COVID-19 Prevalence in the Early Stage of the Epidemic  
 298 in The Netherlands. *Environmental Science & Technology Letters* **2020**, 7, (7), 511-516.
- 299 8. Randazzo, W.; Truchado, P.; Cuevas-Ferrando, E.; Simón, P.; Allende, A.; Sánchez, G., SARS-CoV-2  
 300 RNA in wastewater anticipated COVID-19 occurrence in a low prevalence area. *Water Research* **2020**,  
 301 *181*, 115942.
- 302 9. Sherchan, S. P.; Shahin, S.; Ward, L. M.; Tandukar, S.; Aw, T. G.; Schmitz, B.; Ahmed, W.; Kitajima,  
 303 M., First detection of SARS-CoV-2 RNA in wastewater in North America: A study in Louisiana, USA.  
 304 *Science of The Total Environment* **2020**, 140621.
- 305 10. La Rosa, G.; Mancini, P.; Bonanno Ferraro, G.; Veneri, C.; Iaconelli, M.; Bonadonna, L.; Lucentini,  
 306 L.; Suffredini, E., SARS-CoV-2 has been circulating in northern Italy since December 2019: evidence from  
 307 environmental monitoring. *medRxiv* **2020**, 2020.06.25.20140061.
- 308 11. Kitajima, M.; Oka, T.; Takagi, H.; Tohya, Y.; Katayama, H.; Takeda, N.; Katayama, K., Development  
 309 and application of a broadly reactive real-time reverse transcription-PCR assay for detection of murine  
 310 noroviruses. *Journal of Virological Methods* **2010**, 169, (2), 269-273.
- 311 12. GaStat Per capita water consumption drops for first time in 5 years.  
 312 <https://saudigazette.com.sa/article/535696> (31 July 2020 ),
- 313 13. Haramoto, E.; Katayama, H.; Ohgaki, S., Detection of noroviruses in tap water in Japan by means  
 314 of a new method for concentrating enteric viruses in large volumes of freshwater. *Appl Environ*  
 315 *Microbiol* **2004**, 70, (4), 2154-2160.
- 316 14. CDC Real-Time RT-PCR Panel for Detection 2019-Novel Coronavirus  
 317 <https://www.cdc.gov/coronavirus/2019-ncov/downloads/rt-pcr-panel-for-detection-instructions.pdf>
- 318 15. CDC, Research use only 2019-novel coronavirus (2019-nCoV) real-time RT-PCR panel primer and  
 319 probe information. In 2020.

- 320 16. Forster, P.; Forster, L.; Renfrew, C.; Forster, M., Phylogenetic network analysis of SARS-CoV-2  
321 genomes. *Proceedings of the National Academy of Sciences* **2020**, 202004999.
- 322 17. Green, H.; Wilder, M.; Middleton, F. A.; Collins, M.; Fenty, A.; Gentile, K.; Kmush, B.; Zeng, T.;  
323 Larsen, D. A., Quantification of SARS-CoV-2 and cross-assembly phage (crAssphage) from wastewater to  
324 monitor coronavirus transmission within communities. *medRxiv* **2020**, 2020.05.21.20109181.
- 325 18. Goodridge, L.; Goodridge, C.; Wu, J.; Griffiths, M.; Pawliszyn, J., Isoelectric Point Determination  
326 of Norovirus Virus-like Particles by Capillary Isoelectric Focusing with Whole Column Imaging Detection.  
327 *Analytical Chemistry* **2004**, *76*, (1), 48-52.
- 328 19. Pickett, B. E.; Sadat, E. L.; Zhang, Y.; Noronha, J. M.; Squires, R. B.; Hunt, V.; Liu, M.; Kumar, S.;  
329 Zaremba, S.; Gu, Z.; Zhou, L.; Larson, C. N.; Dietrich, J.; Klem, E. B.; Scheuermann, R. H., ViPR: an open  
330 bioinformatics database and analysis resource for virology research. *Nucleic Acids Res* **2012**, *40*,  
331 (Database issue), D593-D598.
- 332 20. Scheller, C.; Krebs, F.; Minkner, R.; Astner, I.; Gil-Moles, M.; Wätzig, H., Physicochemical  
333 properties of SARS-CoV-2 for drug targeting, virus inactivation and attenuation, vaccine formulation and  
334 quality control. *ELECTROPHORESIS* **2020**, *41*, (13-14), 1137-1151.
- 335 21. Gerba, C. P.; Betancourt, W. Q., Viral Aggregation: Impact on Virus Behavior in the Environment.  
336 *Environ Sci Technol* **2017**, *51*, (13), 7318-7325.
- 337 22. Döhla, M.; Wilbring, G.; Schulte, B.; Kümmerer, B. M.; Diegmann, C.; Sib, E.; Richter, E.; Haag, A.;  
338 Engelhart, S.; Eis-Hübinger, A. M.; Exner, M.; Streeck, H.; Schmithausen, R. M., SARS-CoV-2 in  
339 environmental samples of quarantined households. *medRxiv* **2020**, 2020.05.28.20114041.
- 340 23. Sharif, S.; Ikram, A.; Khurshid, A.; Salman, M.; Mehmood, N.; Arshad, Y.; Ahmad, J.; Angez, M.;  
341 Alam, M. M.; Rehman, L.; Mujtaba, G.; Hussain, J.; Ali, J.; Akthar, R.; Malik, M. W.; Baig, Z. I.; Rana, M. S.;  
342 Usman, M.; Ali, M. Q.; Ahad, A.; Badar, N.; Umair, M.; Tamim, S.; Ashraf, A.; Tahir, F.; Ali, N., Detection of  
343 SARS-Coronavirus-2 in wastewater, using the existing environmental surveillance network: An  
344 epidemiological gateway to an early warning for COVID-19 in communities. *medRxiv* **2020**,  
345 2020.06.03.20121426.
- 346 24. Wu, F.; Xiao, A.; Zhang, J.; Moniz, K.; Endo, N.; Armas, F.; Bonneau, R.; Brown, M. A.; Bushman,  
347 M.; Chai, P. R.; Duvallet, C.; Erickson, T. B.; Foppe, K.; Ghaeli, N.; Gu, X.; Hanage, W. P.; Huang, K. H.; Lee,  
348 W. L.; Matus, M.; McElroy, K. A.; Nagler, J.; Rhode, S. F.; Santillana, M.; Tucker, J. A.; Wuertz, S.; Zhao, S.;  
349 Thompson, J.; Alm, E. J., SARS-CoV-2 titers in wastewater foreshadow dynamics and clinical presentation  
350 of new COVID-19 cases. *medRxiv* **2020**, 2020.06.15.20117747.
- 351 25. Zhang, D.; Ling, H.; Huang, X.; Li, J.; Li, W.; Yi, C.; Zhang, T.; Jiang, Y.; He, Y.; Deng, S.; Zhang, X.;  
352 Wang, X.; Liu, Y.; Li, G.; Qu, J., Potential spreading risks and disinfection challenges of medical  
353 wastewater by the presence of Severe Acute Respiratory Syndrome Coronavirus 2 (SARS-CoV-2) viral  
354 RNA in septic tanks of Fangcang Hospital. *Science of The Total Environment* **2020**, *741*, 140445.

355



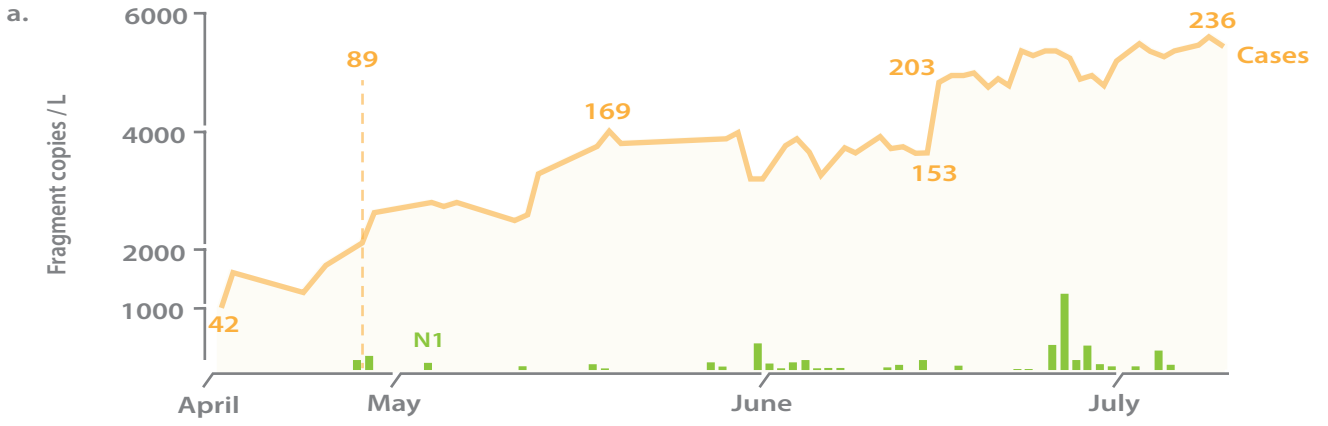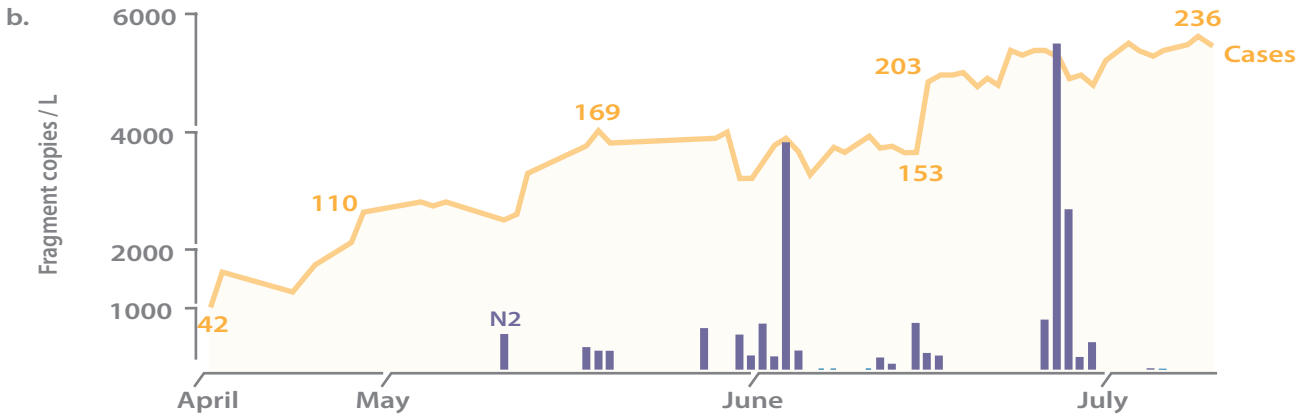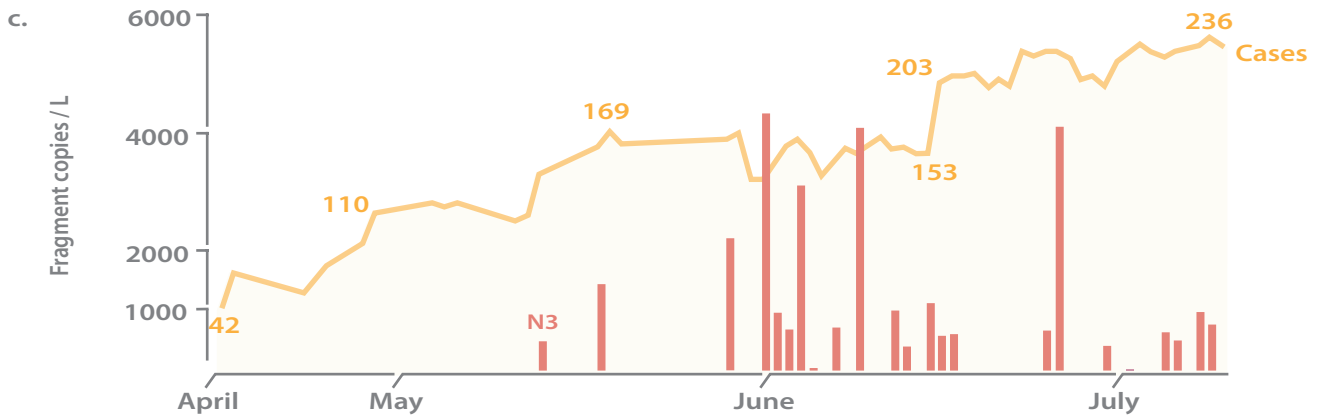

**How early into the outbreak can surveillance of SARS-CoV-2 in wastewater tell us?**

**Pei-Ying Hong <sup>1\*</sup>, Andri Taruna Rachmadi <sup>1</sup>, David Mantilla Calderon <sup>1</sup>, Mohsen Alkahtani <sup>2</sup>, Yasir  
M. Bashwari <sup>3</sup>, Hamed Al Qarni <sup>3</sup>, Jianqiang Zhou <sup>1</sup>**

<sup>1</sup>. Division of Biological and Environmental Science and Engineering, Water Desalination and Reuse Center, King Abdullah University of Science and Technology (KAUST), Thuwal 23955-6900, Saudi Arabia

<sup>2</sup>. Environmental Health Laboratory, Jeddah, Ministry of Health, Saudi Arabia

<sup>3</sup>. General Directorate of Environment Health, Ministry of Health, Saudi Arabia

\* Corresponding author

Email: [peiyong.hong@kaust.edu.sa](mailto:peiyong.hong@kaust.edu.sa)

Phone: +966 12 8082218

## TOC

|                                                                                          |   |
|------------------------------------------------------------------------------------------|---|
| <b>Table S1.</b> Information on the sampling dates at the respective sampling point..... | 1 |
|------------------------------------------------------------------------------------------|---|

**Table S1.** Information on the sampling dates at the respective sampling point. Gray cell indicates sampling was performed at the septic tank on that particular date. Green cell indicates sampling was performed at the biological tank on that particular date. Values in each cell refer to the filtered volume.

| Sampling date in year 2020 | Underground septic tank (filtered volume in mL) | Biological activated sludge tank (filtered volume in mL) | Number of cases hospitalized |
|----------------------------|-------------------------------------------------|----------------------------------------------------------|------------------------------|
| 15 April (Wed)             | NA                                              | 300                                                      | 42                           |
| 16 April (Thurs)           | NA                                              | 300                                                      | 68                           |
| 22 April (Wed)             | 300                                             | NA                                                       | 53                           |
| 24 April (Fri)             | 350                                             | NA                                                       | 73                           |
| 27 April (Mon)             | 500                                             | NA                                                       | 89                           |
| 28 April (Tues)            | 250                                             | NA                                                       | 110                          |
| 3 May (Sun)                | 300                                             | 500                                                      | 118                          |
| 4 May (Mon)                | 300                                             | 500                                                      | 115                          |
| 5 May (Tues)               | 500                                             | 500                                                      | 118                          |
| 10 May (Sun)               | 500                                             | 500                                                      | 105                          |
| 11 May (Mon)               | 500                                             | 500                                                      | 109                          |
| 12 May (Tues)              | 500                                             | 450                                                      | 138                          |
| 17 May (Sun)               | 500                                             | 500                                                      | 158                          |
| 18 May (Mon)               | 500                                             | 500                                                      | 169                          |
| 19 May (Tues)              | 500                                             | 500                                                      | 159                          |
| 27 May (Wed)               | 500                                             | 500                                                      | 163                          |
| 28 May (Thurs)             | 500                                             | 500                                                      | 163                          |
| 29 May (Fri)               | 500                                             | 500                                                      | 168                          |
| 30 May (Sat)               | 500                                             | 500                                                      | 134                          |
| 31 May (Sun)               | 500                                             | 500                                                      | 134                          |
| 1 Jun (Mon)                | 400                                             | 500                                                      | 147                          |
| 2 Jun (Tues)               | 400                                             | 500                                                      | 158                          |
| 3 Jun (Wed)                | 400                                             | 500                                                      | 164                          |
| 4 Jun (Thurs)              | 500                                             | 500                                                      | 153                          |
| 5 Jun (Fri)                | 500                                             | 500                                                      | 137                          |
| 6 Jun (Sat)                | 500                                             | 500                                                      | 147                          |
| 7 Jun (Sun)                | 500                                             | 500                                                      | 157                          |
| 8 Jun (Mon)                | 500                                             | 500                                                      | 153                          |
| 9 Jun (Tues)               | 500                                             | 500                                                      | 159                          |
| 10 Jun (Wed)               | 400                                             | 500                                                      | 165                          |
| 11 Jun (Thurs)             | 400                                             | NA                                                       | 156                          |
| 12 Jun (Fri)               | 500                                             | NA                                                       | 157                          |
| 13 Jun (Sat)               | 400                                             | 500                                                      | 153                          |
| 14 Jun (Sun)               | 500                                             | 430                                                      | 153                          |
| 15 Jun (Mon)               | 500                                             | 500                                                      | 203                          |
| 16 Jun (Tues)              | 500                                             | NA                                                       | 208                          |
| 17 Jun (Wed)               | 500                                             | 500                                                      | 207                          |
| 18 Jun (Thurs)             | 500                                             | 500                                                      | 209                          |
| 19 Jun (Fri)               | 500                                             | 500                                                      | 200                          |
| 20 Jun (Sat)               | 500                                             | 500                                                      | 206                          |
| 21 Jun (Sun)               | 500                                             | 500                                                      | 201                          |
| 22 Jun (Mon)               | 500                                             | 500                                                      | 226                          |
| 23 Jun (Tues)              | 500                                             | 500                                                      | 222                          |
| 24 Jun (Wed)               | 400                                             | 500                                                      | 225                          |

|                |     |     |     |
|----------------|-----|-----|-----|
| 25 Jun (Thurs) | 400 | 500 | 225 |
| 26 Jun (Fri)   | 400 | 400 | 221 |
| 27 Jun (Sat)   | 400 | NA  | 205 |
| 28 Jun (Sun)   | 500 | 500 | 208 |
| 29 Jun (Mon)   | 400 | 500 | 201 |
| 30 Jun (Tues)  | 400 | 500 | 218 |
| 1 Jul (Wed)    | 400 | 500 | 224 |
| 2 Jul (Thurs)  | 400 | 500 | 231 |
| 3-Jul (Fri)    | 300 | 500 | 225 |
| 4-Jul (Sat)    | 400 | 500 | 222 |
| 5-Jul (Sun)    | 400 | 500 | 226 |
| 6-Jul (Mon)    | 400 | 500 | 228 |
| 7-Jul (Tues)   | 400 | 500 | 230 |
| 8-Jul (Wed)    | 400 | 400 | 236 |
| 9-Jul (Thurs)  | 400 | 500 | 230 |
